# Supplementary material for: Experiences and resultant care gaps among women with HIV in Canada: concept mapping the Canadian HIV Women’s Sexual and Reproductive Health Cohort Study (CHIWOS) findings
Source: PubMed Central journal article supplement — BMJ Open. 2024 Apr 3;14(4):e078833. doi: 10.1136/bmjopen-2023-078833 (PMC11146408; doi:10.1136/bmjopen-2023-078833), 2024-04-03
Supplement: bmjopen-2023-078833supp001.pdf [file bmjopen-2023-078833supp001.pdf]

**Supplementary Material: References for the included publications in Table 1**

Andany N, Kaida A, de Pokomandy A, et al. Prevalence and correlates of early-onset menopause among women living with HIV in Canada. *Menopause*. 2020;27(1):66-75.

Boucoiran I, Kaida A, Skerritt L, et al. Practice, support and stigma related to infant feeding among women living with HIV in Canada. Paper presented at: The 28th Annual Canadian Conference on HIV/AIDS Research; 2019 May 9-12; Saskatchewan, Canada.

Carter A, Greene S, Money D, et al. Love with HIV: A latent class analysis of sexual and intimate relationship experiences among women living with HIV in Canada. *Arch Sex Behav*. 2019;48(4):1015-1040.

(a) Carter A, Greene S, Money D, et al. Supporting the sexual rights of women living with HIV: A critical analysis of sexual satisfaction and pleasure across five relationship types. *J Sex Res*. 2018;55(9):1134-1154.

(b) Carter A, Greene S, Money DM, et al. The Importance of Sex in the Lives of Women Living with HIV: A Critical Quantitative Analysis. *International Journal of Sexual Health*. 2018; 30:110-192.

Carter A, Loutfy M, de Pokomandy A, et al. Health-related quality-of-life and receipt of women-centered HIV care among women living with HIV in Canada. *Women Health*. 2018;58(5):498-518.

Carter A, Patterson S, Kestler M. et al. Sexual anxiety among women living with HIV in the era of antiretroviral treatment suppressing HIV transmission. *Sex Res Soc Policy*. 2020; 17: 765–779.

Carter A, Roth EA, Ding E, et al. Substance use, violence, and antiretroviral adherence: A latent class analysis of women living with HIV in Canada. *AIDS Behav*. 2018;22(3):971-985.

Churchill, SG. Child abuse as a determinant of barriers to HIV status disclosure among women in Canada [dissertation]. London (CAN): The University of Western Ontario; 2018.

Conway T, Gormley R, Lee M, et al. Who accesses peer support at HIV clinics and AIDS service organizations? Findings from the Canadian HIV Women's Sexual and Reproductive Health Cohort Study (CHIWOS). Paper presented at: The 28th Annual Canadian Conference on HIV/AIDS Research; 2019 May 9-12; Saskatchewan, Canada.

de Pokomandy A, Burchell AN, Salters K, et al. Cervical cancer screening among women living with HIV: a cross-sectional study using the baseline questionnaire data from the Canadian HIV Women's Sexual and Reproductive Health Cohort Study (CHIWOS). *CMAJ Open*. 2019;7(2):E217-E226.

Fortin-Hughes M, Proulx-Boucher K, Rodrigue C, et al. Previous experiences of pregnancy and early motherhood among women living with HIV: a latent class analysis. *AIDS Care*. 2019;31(11):1427-1434.

Gormley R, Nicholson V, Parry R, et al. Help-seeking to cope with experiences of violence among women living with HIV in Canada. *Violence Against Women*. 2022; 22(3-4):823-850.

Heer E, Kaida A, O'Brien N, Kleiner B, et al. Prevalence of physical health, mental health, and disability comorbidities among women living with HIV in Canada. *J Pers Med*. 2022 Aug 6;12(8):1294.

Jaworsky D, Logie CH, Wagner AC, et al. Geographic differences in the experiences of HIV-related stigma for women living with HIV in northern and rural communities of Ontario, Canada. *Rural Remote Health*. 2018;18(3):4522.

Kaida A, Carter A, de Pokomandy A, et al. Sexual inactivity and sexual satisfaction among women living with HIV in Canada in the context of growing social, legal, and public health surveillance. *J. Int. AIDS Soc*. 2015;18:20284.

Kaida A, Conway T, Balleny R, et al. Is peer leadership engagement associated with awareness of the HIV prevention benefits of art? A cross-sectional analysis of women living with HIV in Canada in the U=U era. Poster presented at: The 28th Annual Canadian Conference on HIV/AIDS Research; 2019 May 9-12; Saskatchewan, Canada.

Kaida A, de Pokomandy A, et al. Prevalence and correlates of forced sex as a self-reported mode of HIV acquisition among a cohort of women living with HIV in Canada. *J Interpers Violence*. 2020;35(21-22):5028-5063.

Kaida A, Gormley R, Salters A, et al. Prevalence and trends of livebirth and therapeutic abortion among a community-based cohort of women living with HIV in Canada. Paper presented at: The 28th Annual Canadian Conference on HIV/AIDS Research; 2019 May 9-12; Saskatchewan, Canada.

Kaida A, Money D, Pick N, et al. Uptake of safer conception strategies among women living with HIV in Canada who report pregnancy with an HIV-serodiscordant partner. Poster presented at: The 9th Annual International AIDS Society on HIV Science; 2017 July 23-26; Paris, France.

Kaida A, Nicholson V, Carter A, et al. Mortality among women living with HIV enrolled in Canada's largest community-based cohort study. Poster presented at: The 28th Annual Canadian Conference on HIV/AIDS Research; 2019 May 9-12; Saskatchewan, Canada.

Kaida A, Patterson S, Carter A, et al. Contraceptive choice and use of dual protection among women living with HIV in Canada: Priorities for integrated care. *Perspect Sex Reprod Health*. 2017;49(4):223-236.

Kennedy L, Mellor K, Brophy J, et al. Transition from pediatric to adult HIV care for young women living with HIV. *J Int Assoc Provid AIDS Care*. 2020. 19:1-11.

Kerkerian G, Kestler M, Carter A, et al. Attrition across the HIV cascade of care among a diverse cohort of women living with HIV in Canada. *J Acquir Immune Defic Syndr*. 2018;79(2):226-236.

(a) Kronfil N, Lacombe-Duncan A, Wang Lu, et al. Understanding the correlates of attrition associated with antiretroviral use and viral suppression among women living with HIV in Canada. *AIDS Patient Care and STDs*. 2017;31(10):428-437.

(b) Kronfli N, Lacombe-Duncan A, Wang Y, et al. Access and engagement in HIV care among a national cohort of women living with HIV in Canada. *AIDS Care*. 2017;29(10):1235-1242.

Kteily-Hawa R, Andany N, Wang Y, et al. Quality of life of older women living with HIV: comparative assessment of physical and mental health-related markers using a large Canadian Sexual and Reproductive Health Cohort Study. *HIV Res Clin Pract*. 2019;20(2):35-47.

Kteily-Hawa R, Warren L, Kazemi M, et al. Examining multi-level factors associated with the process of resilience among women living with HIV in a large Canadian cohort study: A structural equation modelling approach. *J Int Assoc Provid AIDS Care*. 2019;18:1-16.

Lacombe-Duncan A, Bauer GR, Logie CH, et al. The HIV care cascade among transgender women with HIV in Canada: A mixed-methods study. *AIDS Patient Care STDS*. 2019;33(7):308-322.

Lacombe-Duncan A, Newman PA, Bauer GR, et al. Gender-affirming healthcare experiences and medical transition among transgender women living with HIV: a mixed-methods study. *Sex Health*. 2019;16(4):367-376.

Lacombe-Duncan A, Persad Y, Bauer GR, et al. Trans women with HIV in Canada: Results of a national community-based cohort study. Poster presented at: Conference on Retroviruses and Opportunistic Infections; 2017 Feb 13-16; Washington, DC.

Lacombe-Duncan A, Warren L, Kay ES, et al. Mental health among transgender women living with HIV in Canada: findings from a national community-based research study. *AIDS Care*. 2021;33(2):192-200.

(a) Logie C, Wang Y, Kazemi M, et al. Exploring the mediating role of tobacco use in the relationship between intersectional stigma and HIV clinical outcomes among women living with HIV in Canada. Paper presented at: The 10th Annual International AIDS Society on HIV Science; 2019 July 24-29; Mexico City, MX.

(b) Logie C, Wang Y, Kazemi M, et al. Exploring the relationship between intersectional stigma, current cannabis use, and mental health among women living with HIV in Canada. Paper presented at: The 28th Annual Canadian Conference on HIV/AIDS Research; 2019 May 9-12; Saskatchewan, Canada.

(a) Logie CH, Lacombe-Duncan A, Wang Y, et al. Pathways From HIV-related stigma to antiretroviral therapy measures in the HIV care cascade for women living with HIV in Canada. *J Acquir Immune Defic Syndr*. 2018;77(2):144-153.

(b) Logie CH, Lacombe-Duncan A, Wang Y, et al. Sexual orientation differences in health and wellbeing among women living with HIV in Canada: Findings from a national cohort study. *AIDS Behav*. 2018;22(6):1987-2001.

Logie CH, Marcus N, Wang Y, et al. A longitudinal study of associations between HIV-related stigma, recent violence and depression among women living with HIV in a Canadian cohort study. *J Int AIDS Soc*. 2019;22(7):e25341.

(a) Logie CH, Wang Y, Kazemi M, et al. Exploring social ecological pathways from resilience to quality of life among women living with HIV in Canada. *AIDS Care*. 2018;30(sup5):S67-S75.

(b) Logie CH, Wang Y, Marcus N, et al. Factors associated with the separate and concurrent experiences of food and housing insecurity among women living with HIV in Canada. *AIDS Behav*. 2018;22(9):3100-3110.

(c) Logie CH, Wang Y, Lacombe-Duncan A, et al. HIV-related stigma, racial discrimination, and gender discrimination: Pathways to physical and mental health-related quality of life among a national cohort of women living with HIV. *Prev Med*. 2018;107:36-44. doi:10.1016/j.ypmed.2017.12.018

Logie CH, Williams CC, Wang Y, et al. Adapting stigma mechanism frameworks to explore complex pathways between intersectional stigma and HIV-related health outcomes among women living with HIV in Canada. *Soc Sci Med*. 2019;232:129-138.

Logie, CH, James LL, Wangari T, et al. HIV, gender, race, sexual orientation, and sex work: A qualitative study of intersectional stigma experienced by HIV-positive women in Ontario, Canada. *PLoS Medicine*. 2011; 8(11): e1001124.

Loutfy M, de Pokomandy A, O'Brien N, et al. The Canadian HIV Women's Sexual and Reproductive Health Cohort Study (CHIWOS): An evaluation of women-centred HIV care. Paper presented at: The 5th Annual International Workshop on HIV and Women; 2015 Feb 21-22; Washington, DC.

Parry R, Lee M, Webster K, et al. Help-seeking after experiences of violence among women living with HIV in Canada: What are we missing? Paper presented at: The 28th Annual Canadian Conference on HIV/AIDS Research; 2019 May 9-12; Saskatchewan, Canada.

Patterson S, Carter A, Nicholson V, et al. Condomless sex among virally suppressed women with HIV with regular HIV-serodiscordant sexual partners in the era of treatment as prevention. *J Acquir Immune Defic Syndr.* 2017;76(4):372-381.

Patterson S, Nicholson V, Milloy MJ, et al. Awareness and understanding of HIV non-disclosure case law and the role of healthcare providers in discussions about the criminalization of HIV non-disclosure among women living with HIV in Canada. *AIDS Behav.* 2020;24(1):95-113.

Puskas CM, Pick N, Carter A, et al. Looking at the levels: Examining the nuances of tiered antiretroviral therapy (ART) adherence among women with HIV in Canada. Poster presented at: The 27th Annual Canadian Conference on HIV/AIDS Research; 2018 Apr 26-29; British Columbia, Canada.

Salter K, Loutfy M, de Pokomandy A, et al. Examining socio-spatial disparities in cervical cancer screening among a cohort of women living with HIV in Canada. Poster presented at: The 24th Annual Canadian Conference on HIV/AIDS Research; 2015 Apr 30-May 3; Ontario, Canada.

Salter K, Loutfy M, de Pokomandy A, et al. Pregnancy incidence and intention after HIV diagnosis among women living with HIV in Canada. *PLoS One.* 2017;12(7):e0180524.

(a) Shokoohi M, Bauer GR, Kaida A, et al. Social determinants of health and self-rated health status: A comparison between women with HIV and women without HIV from the general population in Canada. *PLoS One.* 2019;14(3):e0213901.

(b) Shokoohi M, Bauer GR, Kaida A, et al. Patterns of social determinants of health associated with drug use among women living with HIV in Canada: a latent class analysis. *Addiction.* 2019;114(7):1214-1224.

(c) Shokoohi M, Bauer GR, Kaida A, et al. A latent class analysis of the social determinants of health impacting heavy alcohol consumption among women living with HIV in Canada: The Canadian HIV women's sexual and reproductive health cohort study. *AIDS Behav.* 2019;23(12):3226-3236.

Shokoohi M, Bauer GR, Kaida A, et al. Substance use patterns among women living with HIV compared with the general female population of Canada. *Drug Alcohol Depend.* 2018;191:70-77.

Siou K, Salters K, Wang L, et al. Pregnancy loss among women living with HIV and the role of antiretrovirals: A Canadian perspective. Paper presented at: The 25th Annual Canadian Conference on HIV/AIDS Research; 2016 May 12-15; Manitoba, Canada.

Skerritt L, de Pokomandy A, O'Brien N, et al. Discussing reproductive goals with healthcare providers among women living with HIV in Canada: the role of provider gender and patient comfort. *Sex Reprod Health Matters.* 2021;29(1):1932702.

Skerritt L, Kaida A, Savoie É, et al. Factors and priorities influencing satisfaction with care among women living with HIV in Canada: A fuzzy cognitive mapping study. *J Pers Med.* 2022; 12(7):1079.

Underhill A, Kennedy K, Brophy M, et al. Sexual satisfaction: Determining unique clinical needs of the first generation of young women living with HIV since childhood through the Canadian HIV Women's Sexual and Reproductive Health Cohort Study. Poster presented at: The 9th Annual International AIDS Society on HIV Science; 2017 July 23-26; Paris, France.

Underhill A, Wu W, Logie CH, et al. Prevalence and correlates of HIV disclosure worries among women living with HIV in Canada. Poster presented at: The 27th Annual Canadian Conference on HIV/AIDS Research; 2018 Apr 26-29; British Columbia, Canada.

Valiaveettil C, Loutfy M, Kennedy VL, et al. High prevalence of abnormal menstruation among women living with HIV in Canada. *PLoS One.* 2019;14(12):e0226992.

Wagner AC, Jaworsky D, Logie CH, et al. High rates of posttraumatic stress symptoms in women living with HIV in Canada. *PLoS One.* 2018;13(7):e0200526.

Supplementary Figure 1: Quality of Life Concept Map

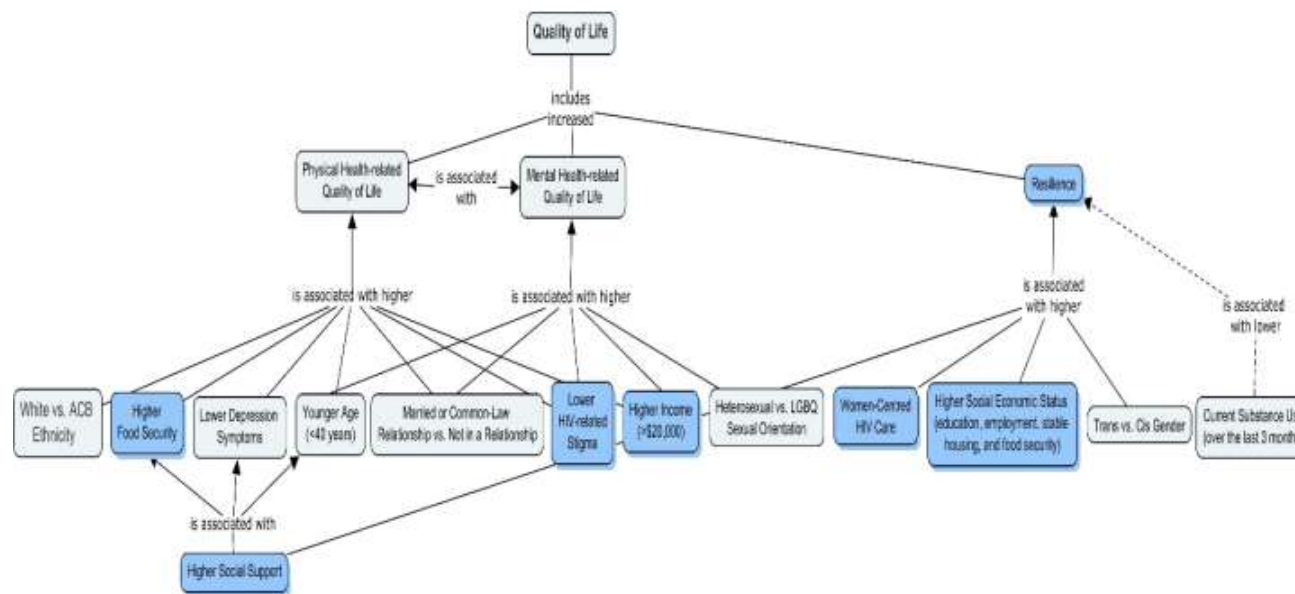

Our definition of Quality of Life (QOL) extends beyond one's physical and mental health status. It is expanded to also include QOL's relationship with resilience and overall wellbeing. QOL was measured using the SF-12 scale.

Supplementary Figure 2: HIV Care Concept Map

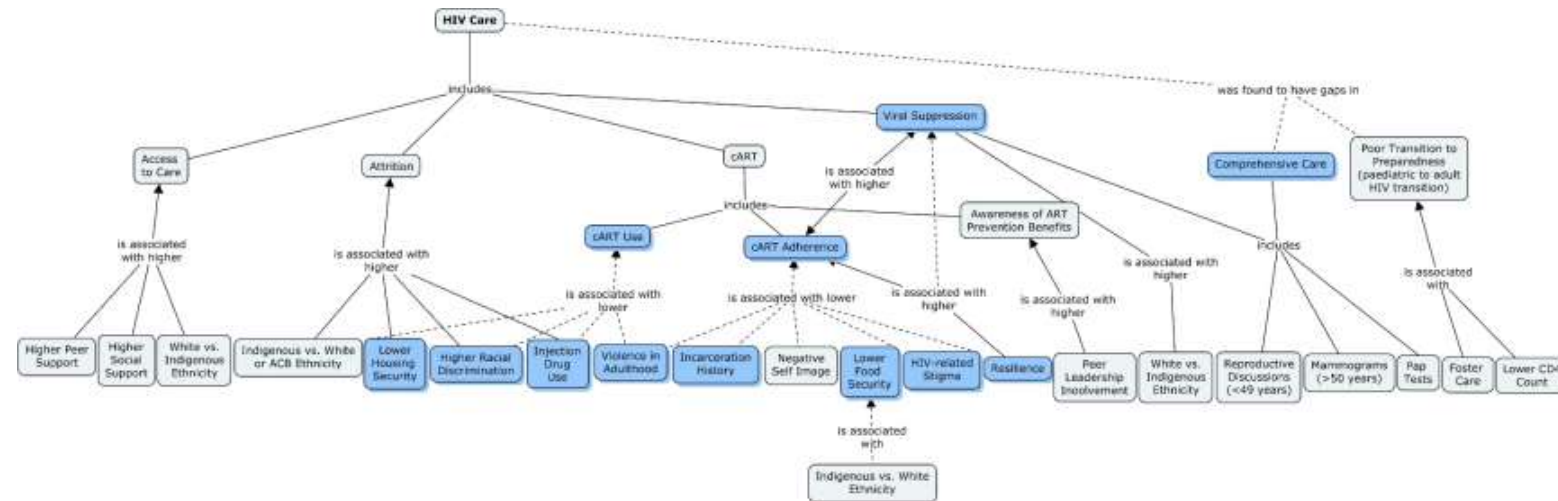

Attrition refers to reduction in the % at each stage of the HIV care cascade. These stages are: 1) access to care, 2) cART use, 3) cART adherence, and 4) viral suppression.

Comprehensive care is defined by four indicators: Pap test, viral load suppression, reproductive discussions, and mammograms.



Supplementary Figure 3: Psychosocial and Mental Health Concept Map

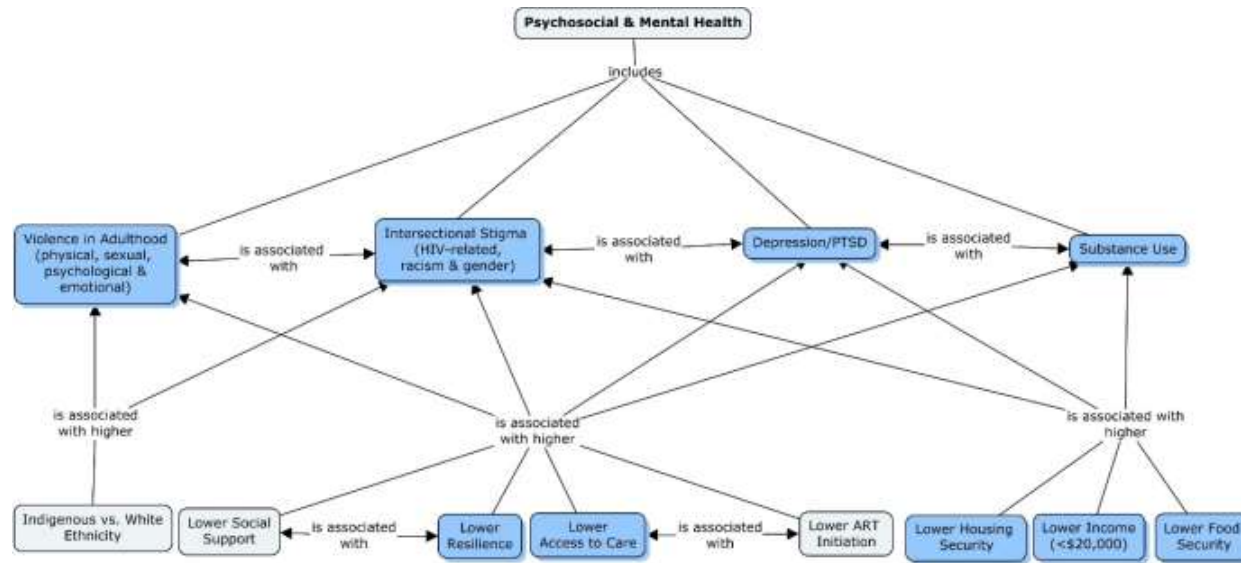

Intersectional stigma, violence, depression/PTSD, and substance use are associated with each other. Also, access to care was measured using the Barriers to Access to Care 12-item scale.

Supplementary Figure 4: Sexual Health Concept Map

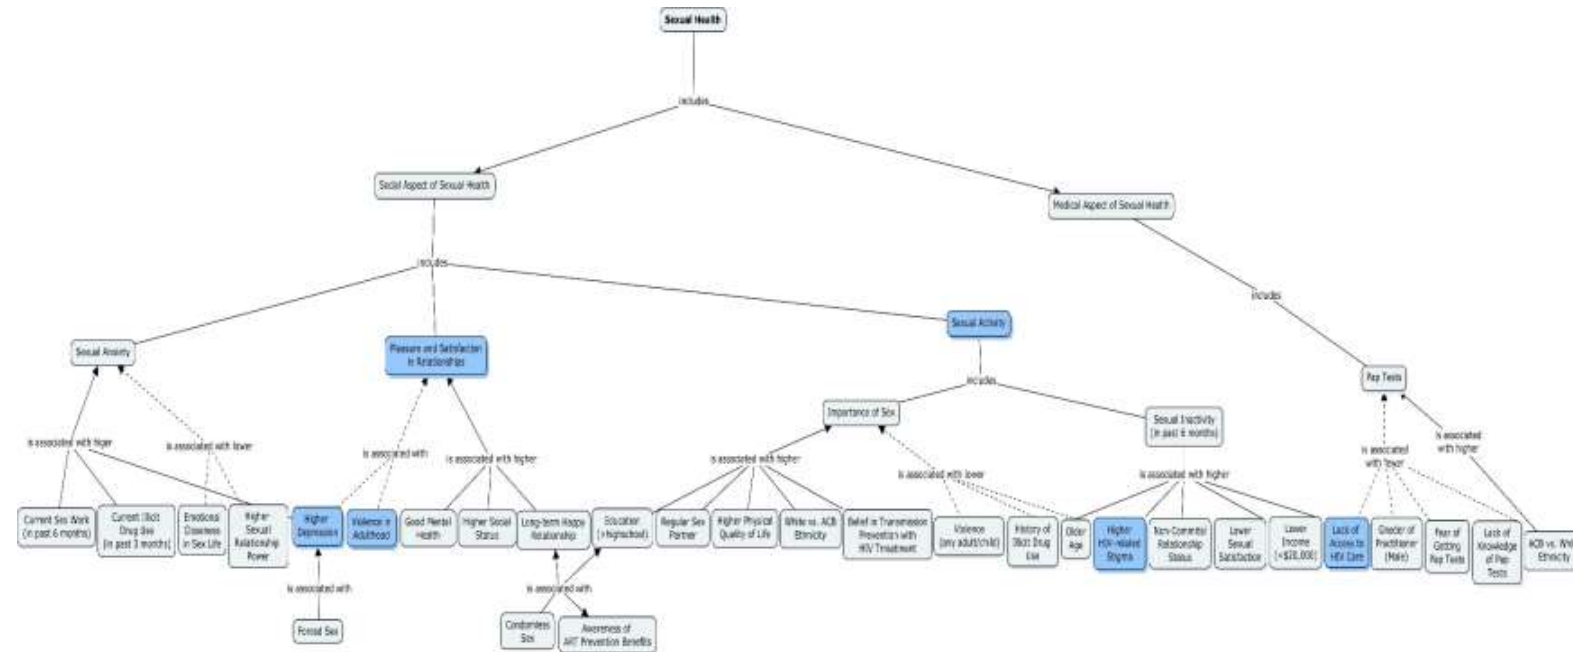

There are various medical aspects of sexual health, including the experiences and management of sexually transmitted infections; however, CHIWOS has not yet analyzed data on them.

Sexual activity was defined as consensual sex (oral or penetrative) in the past six months based on the questionnaire used; but it is understood to represent much more including sexual desire, sexual needs, sexual being, and more.

Supplementary Figure 5: Reproductive Health Concept Map

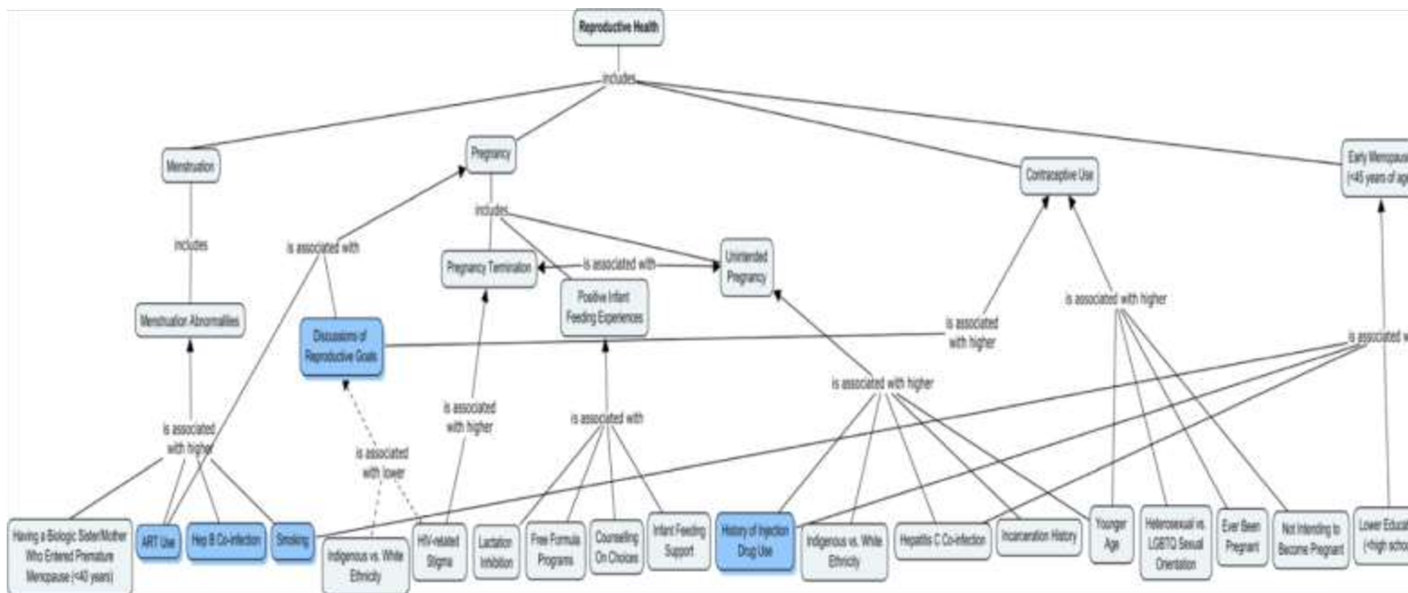

CHIWOS findings showed a narrow range of contraceptive methods used.

Supplementary Figure 6: Trans WLWHIV Concept Map

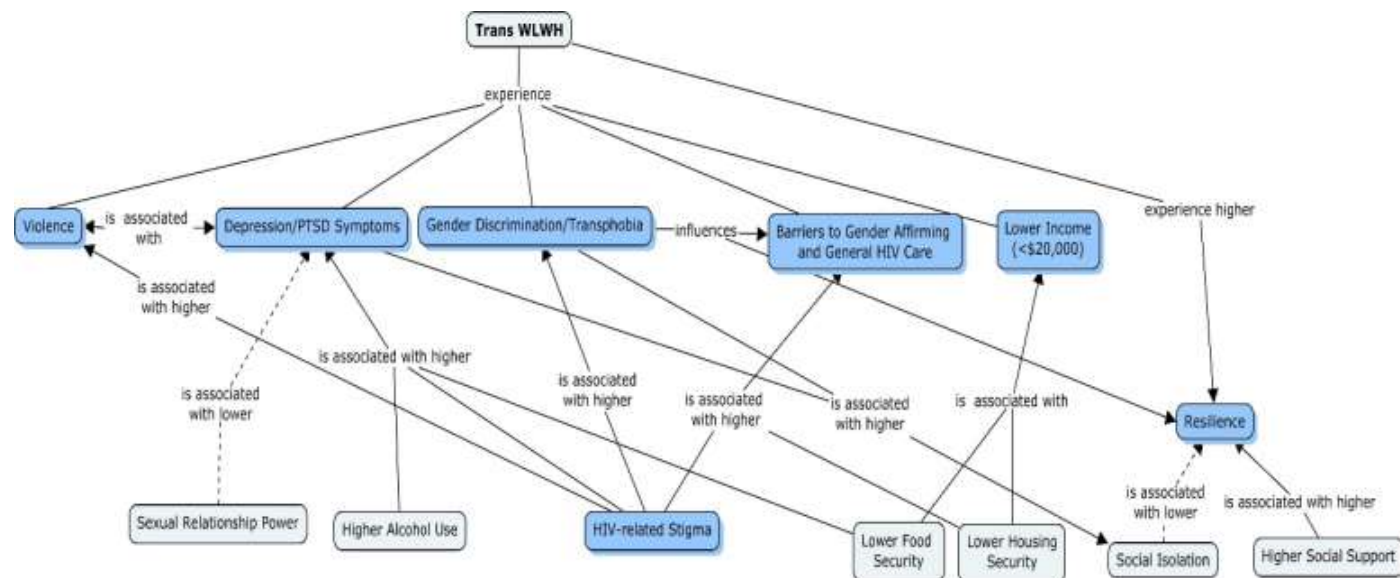

Social isolation is the absence of social and economic supports (i.e., lower income, housing, and food services) which are barriers to ongoing engagement in HIV care. These variables are in comparison to cis-gender women.
